# Supplementary material for: Complex Patterns of Cannabinoid Alkyl Side-Chain Inheritance in Cannabis
Source: Springer Nature journal article supplement (doi:10.1038/s41598-019-47812-2), 2019-08-06
Supplement: MOESM1 [file 41598_2019_47812_MOESM1_ESM.pdf]

# Complex Patterns of Cannabinoid Alkyl Side-Chain Inheritance in *Cannabis*

**Matthew T. Welling<sup>1,2</sup>** , **Lei Liu<sup>1</sup>** , **Carolyn A. Raymond<sup>1</sup>** , **Tobias Kretschmar<sup>1</sup>** , **Omid Ansari<sup>2,3</sup>** , **Graham J. King<sup>1,\*</sup>**

<sup>1</sup>Southern Cross Plant Science, Southern Cross University, Lismore, New South Wales 2480, Australia.

<sup>2</sup>Ecofibre Ltd, Brisbane, Queensland 4014, Australia.

<sup>3</sup>Ananda Hemp Ltd, Cynthiana, Kentucky 41031, USA.

\*graham.king@scu.edu.au

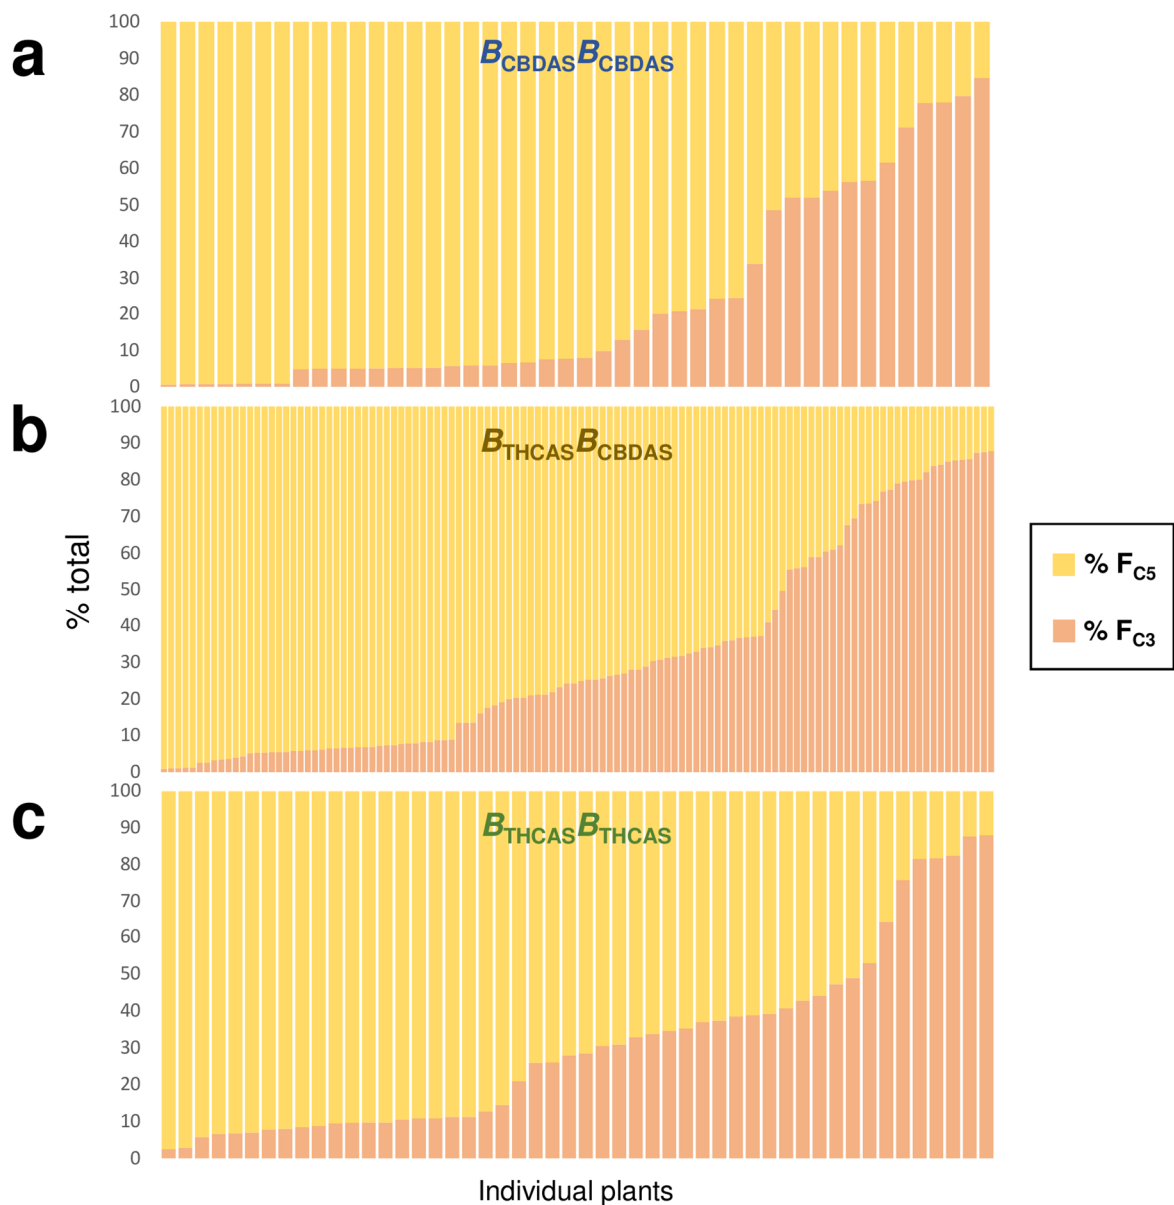

**Supplementary Figure S1.** Alkyl cannabinoid inheritance patterns of locus *B* genotypes. (a) Bar graph of  $B_{CBDAS}B_{CBDAS}$  alkyl cannabinoid chemotypes. (b) Bar graph of  $B_{THCAS}B_{CBDAS}$  alkyl cannabinoid chemotypes. (c) Bar graph of  $B_{THCAS}B_{THCAS}$  alkyl cannabinoid chemotypes. Individual plant chemotypes on the x-axis ordered from low to high F<sub>C3</sub>. C<sub>5</sub>-alkyl cannabinoid fraction (F<sub>C5</sub>); C<sub>3</sub>-alkyl cannabinoid fraction (F<sub>C3</sub>); locus *B* genotypes: homozygote *THCAS* ( $B_{THCAS}B_{THCAS}$ ), homozygote *CBDAS* ( $B_{CBDAS}B_{CBDAS}$ ), heterozygote *THCAS CBDAS* ( $B_{THCAS}B_{CBDAS}$ )

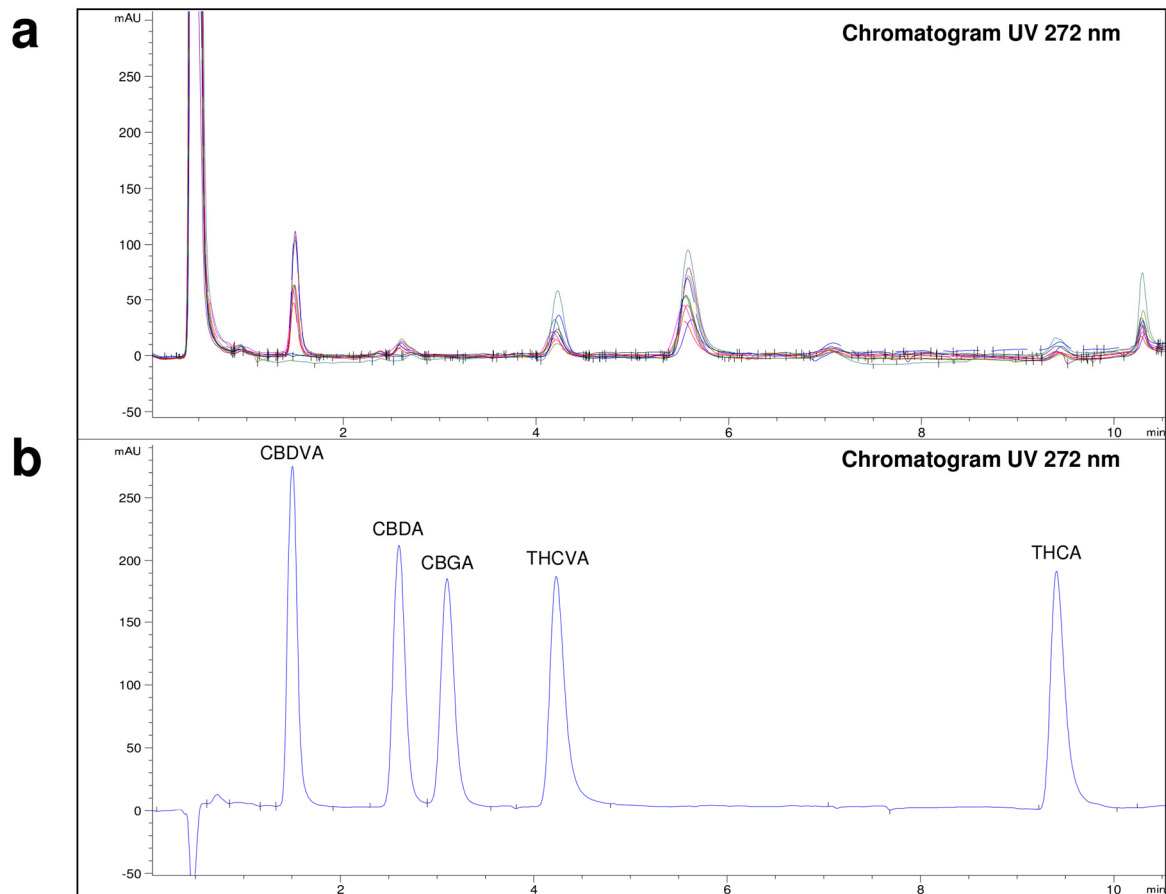

**Supplementary Figure S2.** Chromatograms showing C<sub>3</sub> and C<sub>5</sub> alkyl cannabinoids. (a) Overlay of exemplar chromatograms from F<sub>2</sub> progeny exhibiting C<sub>3</sub>-alkyl cannabinoid maxima chemotypes. Appreciable levels of CBGA not present in the profile of CBDVA/THCVA predominant chemotypes. (b) Chromatogram of alkyl cannabinoid analytical standards. Cannabidiolic acid (CBDA); cannabidivarinic acid (CBDVA); cannabigerolic acid (CBGA); delta(9)-tetrahydrocannabinolic acid (THCA); delta(9)-tetrahydrocannabivarinic acid (THCVA)

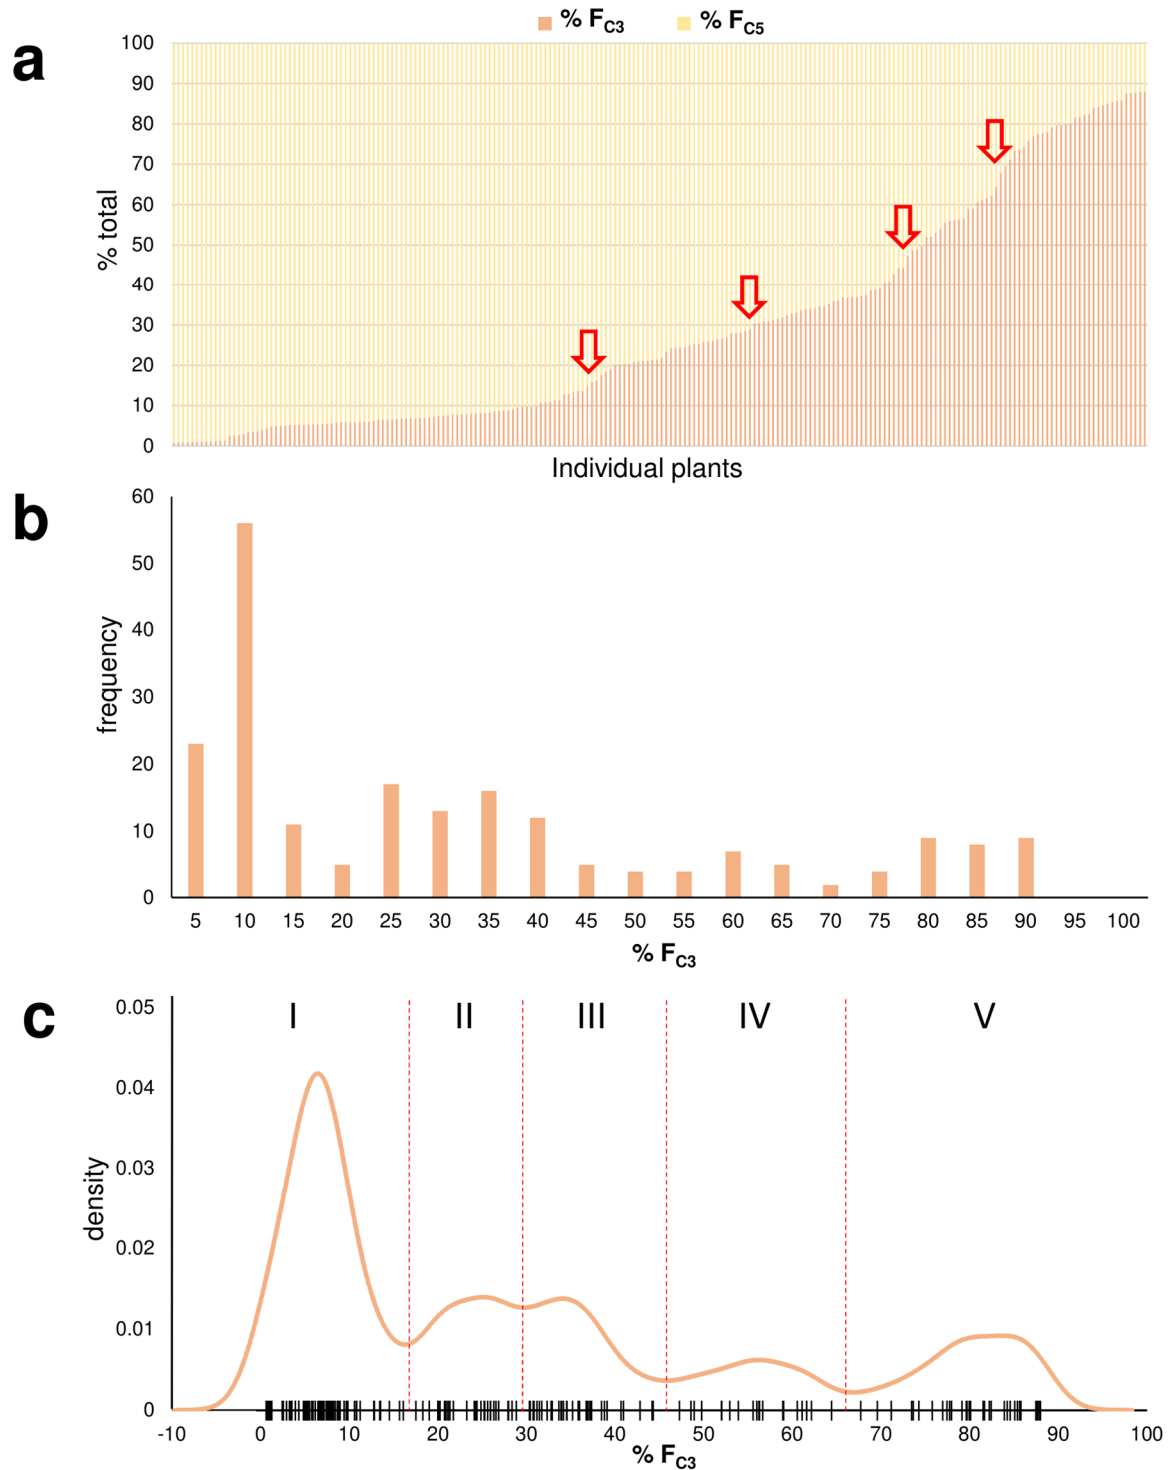

**Supplementary Figure S3.** Inheritance patterns of alkyl cannabinoid composition. (a) Bar graph of alkyl cannabinoid chemotypes of individual plants showing stepwise increases in  $F_{C3}$  value. Individual plant chemotypes on the x-axis ordered from low to high  $F_{C3}$ . (b) Histogram of alkyl cannabinoid chemotypes showing discrete  $F_{C3}$  frequency distributions. (c) Kernel density estimation of  $F_{C3}$  values objectively demarcating data points in to five chemotypic categories. *Black lines* indicate individual plant  $F_{C3}$  values.  $C_5$ -alkyl cannabinoid fraction ( $F_{C5}$ );  $C_3$ -alkyl cannabinoid fraction ( $F_{C3}$ )
